# Supplementary material for: Genetic Characterization of Piroplasms in Donkeys and Horses from Nigeria
Source: Animals (Basel). 2020 Feb 18;10(2):324. doi: 10.3390/ani10020324 (PMC7070495; doi:10.3390/ani10020324)
Supplement: Supplementary file 1 [file animals-10-00324-s001.xlsx]

## Sheet: Nigeria data
No	Label	Species	Farm	Sex	T. equi PCR	TE 18S genotype	TE IFAT	B. caballi PCR	BC rap-1 genotype	BC IFAT
1	DZ1M	Donkey	Zaria	Male	1	C	0	0		0
2	DZ2M	Donkey	Zaria	Male	0		1	0		1
3	DZ3M	Donkey	Zaria	Male	0			0		0
4	DZ4M	Donkey	Zaria	Male	0		0	0		1
5	DZ5M	Donkey	Zaria	Male	1	C	1	1	A1	1
6	DZ6M	Donkey	Zaria	Male	0		0	0		1
7	DZ7M	Donkey	Zaria	Male	1	C	0	0		1
8	DZ8M	Donkey	Zaria	Male	0		0	0		0
9	DZ9M	Donkey	Zaria	Male	0		0	0		1
10	DZ10M	Donkey	Zaria	Male	0		0	0		1
11	DZ11M	Donkey	Zaria	Male	0		0	0		1
12	DZ12M	Donkey	Zaria	Male	1	C	0	0		0
13	DZ13M	Donkey	Zaria	Male	1	A	1	0		0
14	DZ14M	Donkey	Zaria	Male	0			0
15	DZ15M	Donkey	Zaria	Male	0		1	0		1
16	DZ16M	Donkey	Zaria	Male	1	C	1	0		0
17	DZ17M	Donkey	Zaria	Male	0		1	0		1
18	DZ18M	Donkey	Zaria	Male	0		1	0		1
19	DZ19M	Donkey	Zaria	Male	1	D	1	0		1
20	DZ20M	Donkey	Zaria	Male	0		0	1	A1	0
21	DZ21M	Donkey	Zaria	Male	0		1	0		1
22	DZ22M	Donkey	Zaria	Male	1	A	1	1	A1	1
23	DZ23M	Donkey	Zaria	Male	0		0	0		0
24	DZ24M	Donkey	Zaria	Male	1	A	0	1	A1	0
25	DZ25M	Donkey	Zaria	Male	0			0
26	DZ26M	Donkey	Zaria	Male	1	B	0	0		0
27	DZ27M	Donkey	Zaria	Male	1	C	0	0		1
28	DZ28M	Donkey	Zaria	Male	1	D	1	0		1
29	DZ29M	Donkey	Zaria	Male	0		0	0		0
30	DZ30M	Donkey	Zaria	Male	0		0	0		0
31	DZ31M	Donkey	Zaria	Male	1	A	1	0		1
32	DZ32M	Donkey	Zaria	Male	0		1	0		0
33	DZ33M	Donkey	Zaria	Male	1	C	0	0		1
34	DZ34M	Donkey	Zaria	Male	1	A	1	0		1
35	DZ35M	Donkey	Zaria	Male	1	A		0
36	DZ36M	Donkey	Zaria	Male	1	B	1	0		0
37	DZ37M	Donkey	Zaria	Male	1	A	1	0		1
38	DZ38M	Donkey	Zaria	Male	0		0	0		1
39	DZ39M	Donkey	Zaria	Male	1	B	1	0		0
40	DZ40M	Donkey	Zaria	Male	1	D	0	0		0
41	DZ41M	Donkey	Zaria				0			1
42	DZ42M	Donkey	Zaria	Male	0		0	0		0
43	DZ43M	Donkey	Zaria	Male	1	C	1	0		1
44	DZ44M	Donkey	Zaria	Male	0		1	0		1
45	DZ45M	Donkey	Zaria	Male	0		0	0		1
46	DZ46M	Donkey	Zaria				1
49	DZ49M	Donkey	Zaria	Male	0		0	0		0
50	DZ50M	Donkey	Zaria	Male	0			0
51	DZ51M	Donkey	Zaria	Male	1	C	0	0		1
52	DZ52M	Donkey	Zaria	Male	0		0	0		1
53	DZ53M	Donkey	Zaria	Male	1	D	1	0		0
54	DZ54M	Donkey	Zaria	Male	0		0	0		0
55	DZ55M	Donkey	Zaria	Male	0		0	0		1
56	DZ56M	Donkey	Zaria	Male	0		1	0		0
57	DZ57M	Donkey	Zaria	Male	1	C		0
61	DZ61M	Donkey	Zaria	Male	1	C	0	0		0
62	DZ62M	Donkey	Zaria	Male	0			1	A1
63	DZ63M	Donkey	Zaria	Male	0		0	0		1
64	DZ64M	Donkey	Zaria	Male	0		0	0		0
111	HZ1M	Horse	Zaria	Male	0			0
222	HZ2M	Horse	Zaria	Male	0			0
333	HZ3M	Horse	Zaria	Male	0			0
444	HZ4	Horse	Zaria	Male	0			0
555	HZ5M	Horse	Zaria	Male	0			0
666	HZ6M	Horse	Zaria	Male	0			0
777	HZ7M	Horse	Zaria	Male	1	C		0
0	MXKD	Horse	Kaduna	Male	1	A		0
1	F1KD	Horse	Kaduna	Female	1	D		0
2	M2KD	Horse	Kaduna	Male	0			0
3	M3KD	Horse	Kaduna	Male	0			0
4	M4KD	Horse	Kaduna	Male	0			0
5	M5KD	Horse	Kaduna	Male	0			0
6	M6KD	Horse	Kaduna	Male	0			0
7	M7KD	Horse	Kaduna	Male	0			0
8	M8KD	Horse	Kaduna	Male	0			0
9	F39KD	Horse	Kaduna	Female	0			0
10	MX1KD	Horse	Kaduna	Male	0			0
11	M11KD	Horse	Kaduna	Male	0			0
12	F12KD	Horse	Kaduna	Female	0			0
13	H13MKD	Horse	Kaduna	Male	0			0
14	F14KD	Horse	Kaduna	Female	0			0
15	F15KD	Horse	Kaduna	Female	0			0
16	F16KD	Horse	Kaduna	Female	0			0
17	F17KD	Horse	Kaduna	Female	0			0
18	F18KD	Horse	Kaduna	Female	0			0
20	F20KD	Horse	Kaduna	Female	0			0
21	M21KD	Horse	Kaduna	Male	0			0
22	F22KD	Horse	Kaduna	Female	0			0
23	F24XKD	Horse	Kaduna	Female	0			0
24	F24KD	Horse	Kaduna	Female	0			0
25	M25KD	Horse	Kaduna	Male	0			0
26	F26KD	Horse	Kaduna	Female	0			0
27	F27KD	Horse	Kaduna	Female	0			0
28	M28KD	Horse	Kaduna	Male	0			0
29	F29KD	Horse	Kaduna	Female	0			0
30	F30KD	Horse	Kaduna	Female	0			0
31	F31KD	Horse	Kaduna	Female	0			0
32	F32KD	Horse	Kaduna	Female	0			0
33	F33KD	Horse	Kaduna	Female	0			0
34	F34KD	Horse	Kaduna	Female	0			0
35	F35KD	Horse	Kaduna	Female	0			0
36	F36KD	Horse	Kaduna	Female	0			0
37	F37KD	Horse	Kaduna	Female	0			0
38	F38KD	Horse	Kaduna	Female	0			0
39	F39KD	Horse	Kaduna	Female	1	C		0
40	M40KD	Horse	Kaduna	Male	0			0
